# Supplementary material for: Rapid diagnosis and intraoperative margin assessment of human lung cancer with fluorescence lifetime imaging microscopy
Source: PubMed Central journal article supplement — BBA Clin. 2017 Apr 27;8:7–13. doi: 10.1016/j.bbacli.2017.04.002 (PMC5447569; doi:10.1016/j.bbacli.2017.04.002), 2017-04-27
Supplement: mmc1.pdf [file mmc1.pdf]

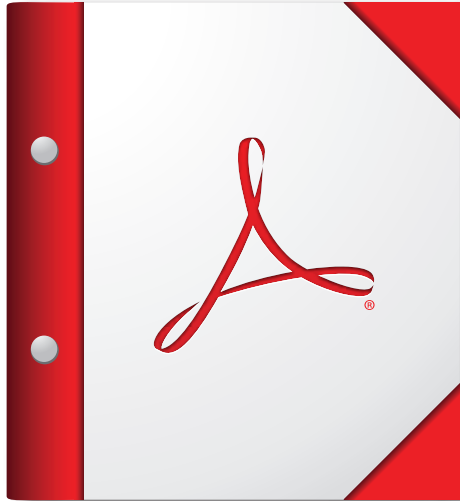

**For the best experience, open this PDF portfolio in  
Acrobat 9 or Adobe Reader 9, or later.**

[Get Adobe Reader Now!](#)
